# Supplementary material for: RNA sequencing reveals an additional Crz1-binding motif in promoters of its target genes in the human fungal pathogen Candida albicans
Source: PubMed Central journal article supplement (PMC6942403; doi:10.1186/s12964-019-0473-9), 2020-01-03
Supplement: 12964_2019_473_MOESM2_ESM.pdf [file 12964_2019_473_MOESM2_ESM.pdf]

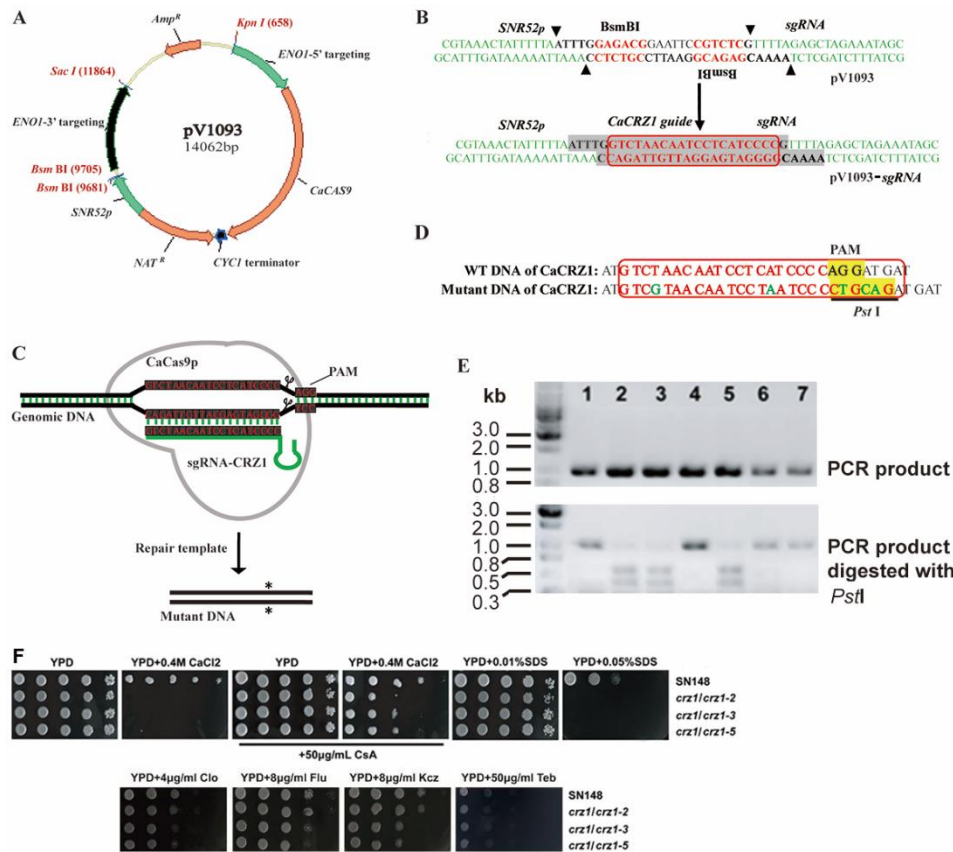

**Figure S1. Construction and phenotypes of CRISPR mutants for *CaCRZ1*.** **A**, The plasmid pV1093 contains *CaCas9* for genome-editing, the antibiotic nourseothricin (NAT) resistant gene ( $NAT^R$ ) for selection of *C. albicans* transformants, the ampicillin resistant gene  $Amp^R$  for selection of *E. coli* transformants, and the flanking sequences of *CaENO1* (*ENO1*-5' targeting and *ENO1*-3' targeting). The flanking sequences of *CaENO1* are used for targeting the *CaENO1* locus for integration of pV1093 or pV1093-SgRNA [58]. **B**, the sequence of *CaCRZ1* synthetic guide RNA (sgRNA) (in red bracket) in the pV1093-sgRNA recombinant plasmid. **C**, Schematic of Cas9 mutagenesis of *CaCRZ1*. The system simultaneously creates homozygous mutations (\*) in the protospacer adjacent motif (PAM) site (**D**) of the *CaCRZ1* to prevent repeated cleavage subsequent to integration. **D**, Two stop codons (TAA) and one *PstI* restriction site are introduced around the PAM site of the mutated *crz1* allele. **E**, Diagnostic *PstI* digestion of PCR products derived from genomic DNA samples of seven *C. albicans* transformants integrated with both repair DNA and pV1093-SgRNA plasmid DNA linearized by both *SacI* and *KpnI*. PCR products were amplified with primers CRZ1-CF and CRZ1-CR (top panel), and they were digested with *PstI* (bottom panel). Three independent *C. albicans* transformants No. 2 (HHCA184), No. 3 (HHCA185) and No. 5 (HHCA187) were potential correct CRISPR mutants for *CaCRZ1*, whose mutated sites in *CaCRZ1* alleles were further confirmed by DNA sequencing. DNA samples were run on 1% agarose gel. **F**, Phenotypes of CRISPR mutants for *CRZ1*. The wild type SN148 and the three CRISPR mutants for *CRZ1* were grown overnight in YPD medium, and their overnight cultures were serially diluted by 10 times and spotted on plates indicated. Plates were incubated at 30°C for 2-3 days. CsA, cyclosporine A. Clo, clotrimazole. Flu, fluconazole. Kcz, ketoconazole. Teb, terbinafine.

|                             |       |                                                     |     |
|-----------------------------|-------|-----------------------------------------------------|-----|
|                             |       | 1                                                   | 50  |
| WT of CaCRZ1                | (1)   | MSNNPHPQDDGSQLYDNFEISPPSIVIRKADTDQSLNKIMLNQESQDINN  |     |
| Optimized version of CaCRZ1 | (1)   | MSNNPHPQDDGSQLYDNFEISPPSIVIRKADTDQSLNKIMLNQESQDINN  |     |
|                             |       | 51                                                  | 100 |
| WT of CaCRZ1                | (51)  | YYTENVKNDNNPNNSYQDYTFSGNSSNQQHQQQQQHLYEDLPTQFHYSN   |     |
| Optimized version of CaCRZ1 | (51)  | YYTENVKNDNNPNNSYQDYTFSGNSSNQQHQQQQQHLYEDLPTQFHYSN   |     |
|                             |       | 101                                                 | 150 |
| WT of CaCRZ1                | (101) | NSFFEPPPAPTVELTDDPLPNFNYPSPNIYINDNASDISLNTKDLPOFTT  |     |
| Optimized version of CaCRZ1 | (101) | NSFFEPPPAPTVELTDDPLPNFNYPSPNIYINDNASDISLNTKDLPOFTT  |     |
|                             |       | 151                                                 | 200 |
| WT of CaCRZ1                | (151) | NEFLSPTSQSLSTPFSPGHYSQLLQDFLQVNHTNGSGNNNNNNNNNNLLNP |     |
| Optimized version of CaCRZ1 | (151) | NEFLSPTSQSLSTPFSPGHYSQSSQDFLQVNHTNGSGNNNNNNNNNNLLNP |     |
|                             |       | 201                                                 | 250 |
| WT of CaCRZ1                | (201) | RSFSQYSSHSLYSDNSSQPASPFLDAASHVSNNSFIPPVIPTALSDVGSQ  |     |
| Optimized version of CaCRZ1 | (201) | RSFSQYSSHSLYSDNSSQPASPFLDAASHVSNNSFIPPVIPTALSDVGSQ  |     |
|                             |       | 251                                                 | 300 |
| WT of CaCRZ1                | (251) | NLDPSHNLGLSANQHFDVNEFLSTGEIQLGQSVSSTNLPSMEEDSIKWG   |     |
| Optimized version of CaCRZ1 | (251) | NLDPSHNLGLSANQHFDVNEFLSTGEIQLGQSVSSTNLPSMEEDSIKWG   |     |
|                             |       | 301                                                 | 350 |
| WT of CaCRZ1                | (301) | GGNGQEAYTSLAMMEQRASADNSGMRLATHQFSETQIKQEDQQTNMNHQY  |     |
| Optimized version of CaCRZ1 | (301) | GGNGQEAYTSLAMMEQRASADNSGMRLATHQFSETQIKQEDQQTNMNHQY  |     |
|                             |       | 351                                                 | 400 |
| WT of CaCRZ1                | (351) | TFSNPQMNFDFDITVTPPPQQLVVKPFGNDKDMNNSSGTTNNNNNNSQFD  |     |
| Optimized version of CaCRZ1 | (351) | TFSNPQMNFDFDITVTPPPQQLVVKPFGNDKDMNNSSGTTNNNNNNSQFD  |     |
|                             |       | 401                                                 | 450 |
| WT of CaCRZ1                | (401) | IVSTAATNNSNQLLTENNLSNYNQLQRTEQGNDNDSLQIHRDATGIIISI  |     |
| Optimized version of CaCRZ1 | (401) | IVSTAATNNSNQLLTENNLSNYNQLQRTEQGNDNDSLQIHRDATGIIISI  |     |
|                             |       | 451                                                 | 500 |
| WT of CaCRZ1                | (451) | NQAPEEIAAKTPSLFSNSSANSIIHNSPRSDIDNKSGQYYNNGGDGNSLV  |     |
| Optimized version of CaCRZ1 | (451) | NQAPEEIAAKTPSLFSNSSANSIIHNSPRSDIDNKSGQYYNNGGDGNSLV  |     |
|                             |       | 501                                                 | 550 |
| WT of CaCRZ1                | (501) | PNSQLLPSSPNSNNDNYGGGSSNDENLLNPEEFQSVKRGRRKSHASRT    |     |
| Optimized version of CaCRZ1 | (501) | PNSQLLPSSPNSNNDNYGGGSSNDENLLNPEEFQSVKRGRRKSHASRT    |     |
|                             |       | 551                                                 | 600 |
| WT of CaCRZ1                | (551) | STNPNSLSPRSRSPRSRSSAKSSNDAVISDNDESDDVLQSREKMLELALPS |     |
| Optimized version of CaCRZ1 | (551) | STNPNSLSPRSRSPRSRSSAKSSNDAVISDNDESDDVLQSREKMLELALPS |     |
|                             |       | 601                                                 | 650 |

|                             |       |                                                     |
|-----------------------------|-------|-----------------------------------------------------|
| WT of CaCRZ1                | (601) | LSSKRTQKHPSLYACHLCDKRFTRPYNLKSHIRHTHTQEKPFICSKCGKLF |
| Optimized version of CaCRZ1 | (601) | SSKRTQKHPSLYACHLCDKRFTRPYNLKSHIRHTHTQEKPFICSKCGKSF  |
|                             | 651   | 700                                                 |
| WT of CaCRZ1                | (651) | ARSHDKKRHELLHQGIKNFKCEGYLDGTRWGCGKLFARADALRRHFQTE   |
| Optimized version of CaCRZ1 | (651) | ARSHDKKRHELLHQGIKNFKCEGYLDGTRWGCGKSFARADALRRHFQTE   |
|                             | 701   | 731                                                 |
| WT of CaCRZ1                | (701) | AGKQCVKRLLLEEQANSSGKPLATSSGVEIT-                    |
| Optimized version of CaCRZ1 | (701) | AGKQCVKRLLLEEQANSSGKPLATSSGVEIT-                    |

**Figure S2. Alignment between the amino acid sequences of the wild type and the codon optimized version of CaCrz1.** All five CTG. codons (L22, L23, L601, L649 and L686) in the wild type are mutated to TCT codon (L22S), AGC codon (L24S), TCC codons (L601S, L649S and L686S) in the optimized version.

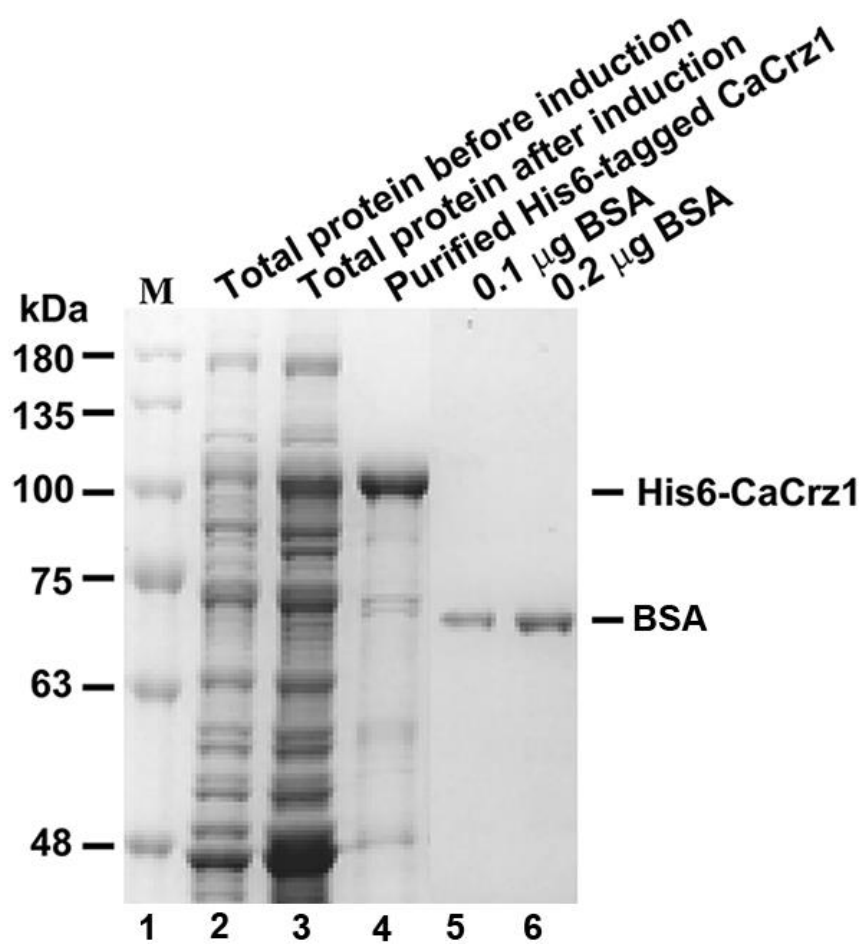

**Figure S3. Expression and purification of the codon optimized and His6-tagged CaCrz1 protein in bacterial cells.** Detection of the IPTG-induced and the purified His6-CaCrz1 fusion protein by Coomassie blue staining. Lane 1, protein size maker. Lane 2, the total protein from *E. coli* cells containing pET28-CaCrz1 before induction by IPTG. Lanes 3, the total proteins from *E. coli* cells induced by IPTG. Lanes 4, the purified codon optimized and His6-tagged Crz1 proteins. Lanes 5 and 6, 0.1  $\mu\text{g}$  and 0.2  $\mu\text{g}$  BSA protein, respectively.

### A

```

CaCrz1 (1) MSNNPHQDDGSQLYDNFEISPPSIVIRKADTDQSLNKIMLNQESQDINNYYTENVKNDNNPNNSYQDYTFSGNSSNQHQHQQQQHLYEDLPTQFHYSN
ScCrz1 (1) -----MSFNGNMAASYMTSSNGEQSINN-----KNDIDDNSAYRRNNER-NSSNSGSHTFQLSDLDLQVDMRMDSAN

CaCrz1 (101) NS-FFEPPPAPTVELDDPLPNFNYPSPSNIYINDNASDISLNTKDLPOFTTN-----EFLSPTSQLSTPFSFGHYSQSSQDFLQVNHTNGSGNNNNN
ScCrz1 (68) SSEKISKNLSSGTPDSFDSNVNLSLLSPSSGYSADLNYSILYKPDLPQQQLQQQLQQQQQQQQQQQQQQQQKQTFTLKVEQSDTFQWDDILTPADNHRP

CaCrz1 (192) NNNNLLNPRS--P---SQYSSHSLYSDNSQCPASPFLLDAASHVSNNSFIPFVIPTALSQVGSQNLDPSSHNLGLSANQHFDVSNFLLSTGFIQLGQSVSS
ScCrz1 (168) SLTNGFLSPRSNYDGTTRSSGIDSNYSDESNYHTPYLYPQDLVSPFAMSHLTANNDDFDLLSVASMNSNYLLPVNSHGYKHISNDELDDLISLYSD

CaCrz1 (287) TNLPSMEEDSIKGGGNGQEAYTSLAMMEGRASADNSGMRLATHQFSETQIKQEDQQTNNMHQYTFSPQMNFDFDITVTFPPOQLVVKPFGNDKDMNNS
ScCrz1 (268) NNLLSASNNSDFNNSNG---IINTADTQNSTIAINK-SKVTNQKMLLTIPSSPSPSTHAAPVLPPIISIQEFNEGHFVKNEDLGTQLKVRDNESY

CaCrz1 (387) SGTINN--NN-NNSQDIVSTAATNNSNQLTENNLSNYNLQRTEQGNDNDSLQIHRDGTGIIISINQAPEEIAAKTPSLFSNSANSIHNSPRSDID
ScCrz1 (364) SATNNNLLRPDDNDNNEALSIDIRSFDLNGRKLKLLKSRRSQSNTNSFTSRSSRSRSISPDEKAKISANREKILEMADLLPSEN-----D

CaCrz1 (484) NKSGQYNNGGDGNLSLVPNSQLLPSSPNSNNDNYGGGSSNDENNLLNPE-EFQSVKRGRKSHASRLSTNPNSLSPRSRSRSRSASAKSSNDAVISDNDE
ScCrz1 (458) NNRERYDNDKTSYNTINSS-----NFDNNDNN-----NNLLTSKPKIESGIVNINELDDTSSKDLGILLDIDSLGQFEQKVGFKNDNHNENDN

CaCrz1 (583) SDDVLSQREKMLELALPSSSSKRTQKHPSLYACHLQDKRFTRPYNLKSHLRTHTEKPFICSKCGHSFARSHDKKRHELHQGIKNFKCEGYLQDQTRWG
ScCrz1 (543) GTFSYKKNNDNEKLDVNNN---RKNPANFACDVCCKKFRPYNLKSHLRTHTEKPFICSCGRAFARQHDKKRHELHGTGKKRIVCGGKLDGKPKWG

CaCrz1 (683) CGKSFARADALRRHFQTEAGTQCVKRIELLEQANS SGKPLATSSGVEIT
ScCrz1 (639) CGKKFARSDALGRHFKTESGRCTTPIYEEARQEKSGQES-----

```

### B

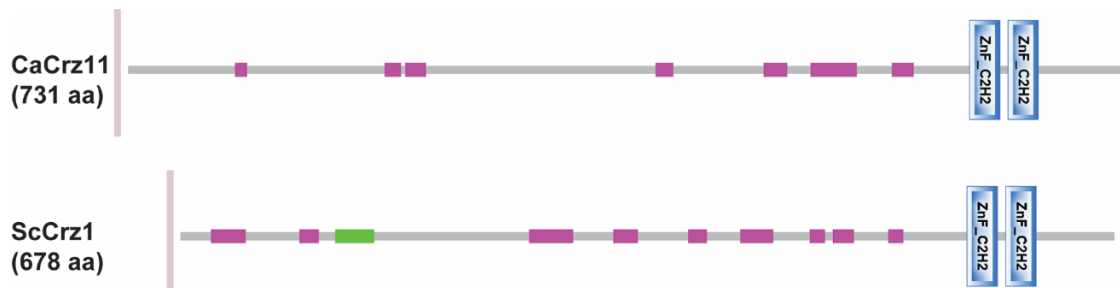

**Figure S4. Differences between CaCrz1 and ScCrz1.** (A) Amino acid sequence alignment between of CaCrz1 and ScCrz1. Their similarity and identity are 31.9% and 24%, respectively. All five CTG codons (L172S, L173S, L601S, L649S and L686S) have been converted according to *C. albicans* codon usage. (B) Predicted structures of CaCrz1 and ScCrz1 by the online SMART software ([http://smart.embl-heidelberg.de/smart/set\\_mode.cgi?GENOMIC=1](http://smart.embl-heidelberg.de/smart/set_mode.cgi?GENOMIC=1)).

**Table S1. Primers used in this study**

| Primer                    | Sequence                                                                                                                                                                           |
|---------------------------|------------------------------------------------------------------------------------------------------------------------------------------------------------------------------------|
| RZ1-sgF                   | <u>atttg</u> GTCTAACAATCCTCATCCCCg ( <i>Bsm</i> BI site attached and underlined)                                                                                                   |
| CRZ1-sgR                  | <u>aaaac</u> GGGGATGAGGATTGTTAGACc ( <i>Bsm</i> BI site attached and underlined)                                                                                                   |
| CRZ1-RF                   | ttcccccttttatatctaaatttcataaatccaatcatGTCG <b>TAACAATCCTAAT</b> <u>CCCCTGCAG</u><br>(two introduced stop codons indicated in red and one introduced <i>Pst</i> I site is bolded)   |
| CRZ1-RR                   | ggtgatattcaaagtatcatatagctgtgacctatcat <u>CTGCAG</u> GGG <b>ATTAGGATTGTTAC</b> GAC<br>(two introduced stop codons indicated in red and one introduced <i>Pst</i> I site is bolded) |
| CRZ1-CF                   | ACTGTGCCAAGTGTGTGTG                                                                                                                                                                |
| CRZ1-CR                   | GTGGTAAACTGAGGCAAGTCC                                                                                                                                                              |
| LR159F                    | CCAAGAAGCATCTAATCAACTCCC                                                                                                                                                           |
| LR159R                    | CGCGTCTAAGTTAGTCTCCGTTT                                                                                                                                                            |
| CRZ1-clonF                | agggaacaaaagct <u>gggtacc</u> GTGTGTGGGTAGTGTATATTGTTCCA, bases in lower case from the <i>Kpn</i> I site (underlined) in the vector Clp10.                                         |
| CRZ1-clonR                | atcgataccgtcgac <u>ctcgag</u> C <sup>G</sup> ACTTGGCTACTTCTTTTTCTGC, bases in lower case from the <i>Xho</i> I site (underlined) in the vector Clp10.                              |
| lacZ_ORF_F( <i>Xho</i> I) | atcgataccgtcgac <u>ctcgag</u> TCCATGAACATGACTGAAAAAATTCAA, the <i>Xho</i> I site is underlined                                                                                     |
| lacZ_ORF_R( <i>Kpn</i> I) | agggaacaaaagct <u>gggtacc</u> CTAATTTAGTGGTTCAATCATGAAG, the <i>Kpn</i> I site is underlined                                                                                       |
| ACT1_T_F( <i>Kpn</i> I)   | gaaccactaaattag <u>gggtacc</u> GAGTGAAATTCTGGAAATCTGGAA, the <i>Kpn</i> I site is underlined                                                                                       |

---

|                    |                                                                                                                    |
|--------------------|--------------------------------------------------------------------------------------------------------------------|
| ACT1_T_R(KpnI)     | agggaca <sup>aaa</sup> agct <sup>ggg</sup> taccATTTTATGATGGAATGAATGGGATG, the <i>KpnI</i> site is underlined       |
| UTR2_P_F(XhoI)     | atcgataccgctcgac <sup>ctcgag</sup> GGAAACAGATCACACACGTACGA, the <i>XhoI</i> site is underlined                     |
| UTR2_P_R(XhoI)     | ttcagtcata <sup>gcca</sup> t <sup>ctcgag</sup> AACAATAGTAGTAATAGTATCGAATGTGCTT, the <i>XhoI</i> site is underlined |
| UTR2_exF           | tgaagg <sup>tt</sup> aaagatctgaatcg                                                                                |
| UTR2_inR           | aaatgctcgataatgttgcc                                                                                               |
| UTR2_(HA)_R        | tt <u>TCTAGA</u> agaaaagaaatgaaatgaaagaaattcaa, the <i>XbaI</i> site is underlined                                 |
| UTR2_(HA)_F        | ttgaattctttcatttcatttctttct <u>TCTAGA</u> aaaatttgattctaaaattttttattt, the <i>XbaI</i> site is underlined          |
| UTR2_(MA)_R        | agaaaagaaatgaaatgaaagaaattcaa <u>TCTAGA</u> acaactcaagaatttaagccaaag, the <i>XbaI</i> site is underlined           |
| UTR2_(MA)_F        | gt <u>TCTAGA</u> ttgaattctttcatttcatttc, the <i>XbaI</i> site is underlined                                        |
| Probe_EMSA_CRZ1_F  | AACAATTTAATCTGGTCATTTTCATTTCCCCTAACAGCATCTTTCCAAGTT, putative CaCrz1-binding site is indicated in red.             |
| Probe_EMSA_CRZ1_R  | AACTTGGAAAGATGCTGTTAGGGGAAATGAAATGACCAGATTAAATTGTT                                                                 |
| Probe1_EMSA_CRZ1_F | TGTGTGTGTGTGTGACAGTCCAGTCCCTCAACTAATTTAAACAGTTTTT                                                                  |
| Probe1_EMSA_CRZ1_R | AAAAACTGTTTTAAATTAGTTGAGGGACTGGACTGTCACACACACACACA                                                                 |
| Probe2_EMSA_CRZ1_F | ATTAGAATAGAATATTATCACAGACCCCCCAATATCTATTTATCAACCT                                                                  |

---

---

|                    |                                                    |
|--------------------|----------------------------------------------------|
| Probe2_EMSA_CRZ1_R | AGGTTGATAAATAGATATTGGGGGGTCTGTGATAAATATTCTATTCTAAT |
| Probe3_EMSA_CRZ1_F | TTTCAACTTCCATCATATTTACCACAATTGGATTAACCTTGGTTAT     |
| Probe3_EMSA_CRZ1_R | ATAACCAAGTTAATCCAATTGTGGTAAATATGATGGAAGTTGAAA      |
| ChIP_CRZ1_F        | GAACCTGTTTGTTTCCTGAGTG                             |
| ChIP_CRZ1_R        | AGCTAGTATCTTCAATAAATATTTCTGC                       |

---
